# Supplementary material for: Enhancing Rubber Vulcanization Cure Kinetics: Lowering Vulcanization Temperature by Addition of MgO as Co-Cure Activator in ZnO-Based Cure Activator Systems
Source: MDPI journal article supplement (doi:10.3390/polym16070876), 2024-03-22
Supplement: s1 [file s1]

# Supporting Information

## Enhancing rubber vulcanization cure kinetics: Lowering vulcanization temperature by addition of MgO as co-cure activator in ZnO-based cure activator systems

Md Najib Alam <sup>1</sup>, Vineet Kumar <sup>1</sup>, Seok U Jeong <sup>2</sup> Sang-Shin Park <sup>1,\*</sup>

<sup>1</sup> School of Mechanical Engineering, Yeungnam University, Gyeongsan, Gyeongbuk 38541, Republic of Korea

<sup>2</sup> Graduate School of Mechanical Engineering, Yeungnam University, Gyeongsan, Gyeongbuk 38541, Republic of Korea

\*Correspondence: S.-S. Park ([pss@ynu.ac.kr](mailto:pss@ynu.ac.kr))

Table S1. Specific rheometric mechanical and kinetic parameters at 100 °C.

| Mix compositions        | M <sub>L</sub> (Nm) | M <sub>H</sub> (Nm) | ΔM (Nm) | M <sub>300</sub> | R <sub>300</sub> (%) | t <sub>2</sub> (min) | t <sub>90</sub> (min) |
|-------------------------|---------------------|---------------------|---------|------------------|----------------------|----------------------|-----------------------|
| SEV/5-ZnO (control-SEV) | 0.35                | 4.75                | 4.4     | -                | -                    | 43.12                | 131.63                |
| SEV/5-ZnO/1-MgO         | 0.67                | 5.46                | 4.79    | 5.43             | 0.5                  | 19.68                | 48.1                  |
| SEV/5-ZnO/2-MgO         | 0.72                | 5.45                | 4.73    | 5.43             | 0.4                  | 12.33                | 39.96                 |
| SEV/5-ZnO/3-MgO         | 0.82                | 5.58                | 4.76    | 5.55             | 0.5                  | 13.38                | 39.44                 |
| SEV/5-MgO               | 0.83                | 3.08                | 2.25    | 3.07             | 0.3                  | 21.17                | 59.02                 |

Table S2. Specific rheometric mechanical and kinetic parameters at 110 °C.

| Mix compositions        | M <sub>L</sub> (Nm) | M <sub>H</sub> (Nm) | ΔM (Nm) | M <sub>300</sub> | R <sub>300</sub> (%) | t <sub>2</sub> (min) | t <sub>90</sub> (min) |
|-------------------------|---------------------|---------------------|---------|------------------|----------------------|----------------------|-----------------------|
| EV/5-ZnO (control-EV)   | 0.22                | 4.52                | 4.31    | -                | -                    | 21.64                | 132.5                 |
| EV/5-ZnO/1-MgO          | 0.64                | 5.31                | 4.66    | 5.30             | 0.2                  | 10.31                | 41.02                 |
| EV/5-ZnO/2-MgO          | 0.71                | 5.43                | 4.72    | 5.42             | 0.2                  | 9.66                 | 37.65                 |
| EV/5-ZnO/3-MgO          | 0.74                | 5.36                | 4.61    | 5.35             | 0.2                  | 8.75                 | 38.61                 |
| EV/5-MgO                | 0.79                | 3.12                | 2.33    | 3.11             | 0.3                  | 14.05                | 37.76                 |
| SEV/5-ZnO (control-SEV) | 0.31                | 5.38                | 5.07    | -                | -                    | 18.62                | 49.93                 |
| SEV/5-ZnO/1-MgO         | 0.62                | 5.55                | 4.93    | 5.52             | 0.5                  | 7.58                 | 21.52                 |
| SEV/5-ZnO/2-MgO         | 0.68                | 5.49                | 4.81    | 5.47             | 0.4                  | 6.64                 | 17.48                 |
| SEV/5-ZnO/3-MgO         | 0.78                | 5.61                | 4.82    | 5.59             | 0.4                  | 6.32                 | 17.27                 |
| SEV/5-MgO               | 0.83                | 3.05                | 2.21    | 3.03             | 0.7                  | 8.71                 | 25.28                 |

Table S3. Specific rheometric mechanical and kinetic parameters at 120 °C.

| Mix compositions      | M <sub>L</sub> (Nm) | M <sub>H</sub> (Nm) | ΔM (Nm) | M <sub>300</sub> | R <sub>300</sub> (%) | t <sub>2</sub> (min) | t <sub>90</sub> (min) |
|-----------------------|---------------------|---------------------|---------|------------------|----------------------|----------------------|-----------------------|
| EV/5-ZnO (control-EV) | 0.19                | 4.78                | 4.58    | -                | -                    | 9.13                 | 70.48                 |
| EV/5-ZnO/1-MgO        | 0.55                | 5.39                | 4.84    | 5.37             | 0.4                  | 4.5                  | 14.35                 |
| EV/5-ZnO/2-MgO        | 0.61                | 5.51                | 4.9     | 5.50             | 0.2                  | 3.99                 | 16.11                 |

|                         |      |      |      |      |     |      |       |
|-------------------------|------|------|------|------|-----|------|-------|
| EV/5-ZnO/3-MgO          | 0.67 | 5.52 | 4.86 | 5.49 | 0.5 | 3.71 | 15.65 |
| EV/5-MgO                | 0.71 | 3.2  | 2.5  | 3.1  | 0.3 | 6.6  | 17.74 |
| SEV/5-ZnO (control-SEV) | 0.27 | 5.71 | 5.45 | 5.7  | 0.2 | 8.24 | 21.32 |
| SEV/5-ZnO/1-MgO         | 0.55 | 5.44 | 4.89 | 5.39 | 0.9 | 3.29 | 9.12  |
| SEV/5-ZnO/2-MgO         | 0.62 | 5.47 | 4.84 | 5.38 | 1.6 | 2.97 | 7.62  |
| SEV/5-ZnO/3-MgO         | 0.72 | 5.65 | 4.93 | 5.56 | 1.6 | 2.74 | 7.61  |
| SEV/5-MgO               | 0.82 | 3.24 | 2.43 | 3.17 | 2.1 | 4.86 | 12.6  |

Table S4. Specific rheometric mechanical and kinetic parameters at 130 °C.

| Mix compositions        | M <sub>L</sub> (Nm) | M <sub>H</sub> (Nm) | ΔM (Nm) | M <sub>300</sub> | R <sub>300</sub> (%) | t <sub>2</sub> (min) | t <sub>90</sub> (min) |
|-------------------------|---------------------|---------------------|---------|------------------|----------------------|----------------------|-----------------------|
| EV/5-ZnO (control-EV)   | 0.17                | 4.34                | 4.18    | -                | -                    | 4.48                 | 16.56                 |
| EV/5-ZnO/1-MgO          | 0.46                | 5.09                | 4.62    | 5.05             | 0.7                  | 2.37                 | 7.09                  |
| EV/5-ZnO/2-MgO          | 0.52                | 5.25                | 4.73    | 5.22             | 0.6                  | 2.02                 | 6.2                   |
| EV/5-ZnO/3-MgO          | 0.58                | 5.28                | 4.7     | 5.26             | 0.4                  | 2.01                 | 7.55                  |
| EV/5-MgO                | 0.64                | 3.37                | 2.72    | 3.12             | 7.4                  | 3.26                 | 8.67                  |
| SEV/5-ZnO (control-SEV) | 0.23                | 5.84                | 5.6     | 5.81             | 0.5                  | 4.48                 | 11.13                 |
| SEV/5-ZnO/1-MgO         | 0.52                | 5.41                | 4.88    | 5.23             | 3.3                  | 2                    | 4.21                  |
| SEV/5-ZnO/2-MgO         | 0.57                | 5.38                | 4.81    | 5.22             | 3.0                  | 1.66                 | 4.05                  |
| SEV/5-ZnO/3-MgO         | 0.65                | 5.58                | 4.92    | 5.39             | 3.4                  | 1.8                  | 3.73                  |
| SEV/5-MgO               | 0.75                | 3.23                | 2.48    | 3.08             | 4.6                  | 2.26                 | 5.95                  |

Table S5. Specific rheometric mechanical and kinetic parameters at 140 °C.

| Mix compositions        | M <sub>L</sub> (Nm) | M <sub>H</sub> (Nm) | ΔM (Nm) | M <sub>300</sub> | R <sub>300</sub> (%) | t <sub>2</sub> (min) | t <sub>90</sub> (min) |
|-------------------------|---------------------|---------------------|---------|------------------|----------------------|----------------------|-----------------------|
| EV/5-ZnO (control-EV)   | 0.17                | 4.36                | 4.18    | 4.35             | 0.2                  | 2.36                 | 8.54                  |
| EV/5-ZnO/1-MgO          | 0.39                | 5.04                | 4.64    | 4.97             | 1.4                  | 1.73                 | 4.24                  |
| EV/5-ZnO/2-MgO          | 0.43                | 5.11                | 4.68    | 5.06             | 1.0                  | 1.57                 | 3.71                  |
| EV/5-ZnO/3-MgO          | 0.48                | 5.12                | 4.64    | 5.06             | 1.2                  | 1.41                 | 3.57                  |
| EV/5-MgO                | 0.57                | 3.27                | 2.71    | 2.75             | 17.1                 | 1.85                 | 4.52                  |
| SEV/5-ZnO (control-SEV) | 0.22                | 5.5                 | 5.28    | 5.48             | 0.4                  | 2.27                 | 5.89                  |
| SEV/5-ZnO/1-MgO         | 0.42                | 5.23                | 4.81    | 4.89             | 6.5                  | 1.42                 | 2.61                  |
| SEV/5-ZnO/2-MgO         | 0.51                | 5.24                | 4.73    | 4.84             | 7.6                  | 1.12                 | 2.11                  |
| SEV/5-ZnO/3-MgO         | 0.61                | 5.49                | 4.88    | 5.06             | 7.8                  | 1.1                  | 2.11                  |
| SEV/5-MgO               | 0.67                | 3.28                | 2.61    | 2.88             | 12.2                 | 1.44                 | 3.32                  |
